# Supplementary material for: POSS-Derived Synthesis and Full Life Structural Analysis of Si@C as Anode Material in Lithium Ion Battery
Source: MDPI journal article supplement (doi:10.3390/polym11040576), 2019-03-29
Supplement: s1 [file s1]

## Supporting Information

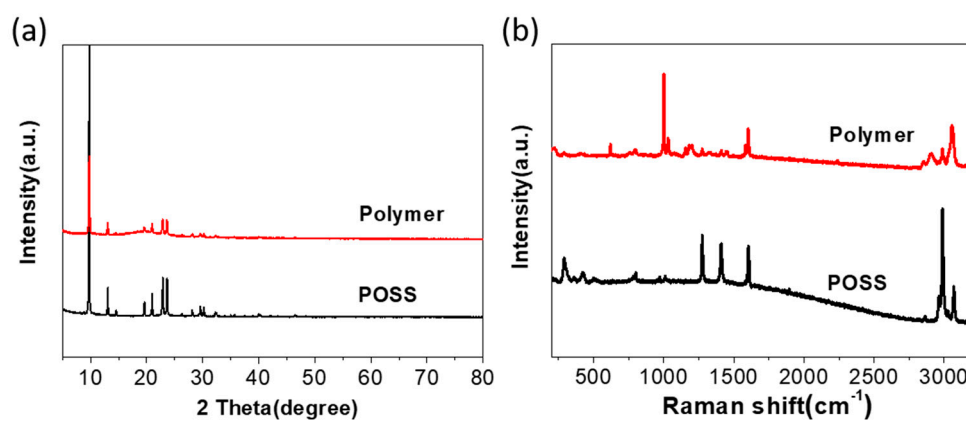

Figure.S1. (a) XRD patterns of POSS and Polymer. (b) Raman spectra of POSS and Polymer.
